# Supplementary material for: Integrated Spheroid-to-Population Framework for Evaluating PFHpA-Associated Metabolic Dysfunction and Steatotic Liver Disease
Source: Research Square preprint supplement (doi:10.21203/rs.3.rs-5960979/v1), 2025-03-04
Supplement: Supplementary file 3 [file e6d1d2caa8723c509382081b.docx]

**Supplemental information:** **PFHpA alters lipid metabolism and increases the risk of metabolic dysfunction-associated steatotic liver disease in youth—a translational research framework**

Table of Contents

**Figure S1.** Association between plasma-PFAS and MASLD in Teen-LABS

**Table S1.** Association between plasma-PFAS and MASLD in Teen-LABS

**Table S2.** PFHpA exposure, histopathological determined outcomes of MASLD in the Teen-LABS study

**Table S3.** Metabolome-Wide Association Study (MWAS) between plasma-PFHpA and metabolites in Teen-LABS

**Table S4.** Proteome-Wide Association Study (PWAS) between plasma-PFHpA and proteins in Teen-LABS

**Figure S2.** Lipid Metabolism Pathways Upregulated in T cells

| **Table S1.**  Association between plasma-PFAS and MASLD in Teen-LABS | | | | |
| --- | --- | --- | --- | --- |
|  | OR | 95% CI | | P Value |
| PFUnDA | 0.66 | 0.41 | 1.06 | 0.34 |
| PFDA | 0.82 | 0.42 | 1.58 | 0.73 |
| PFNA | 0.63 | 0.34 | 1.17 | 0.38 |
| PFOS | 0.78 | 0.46 | 1.33 | 0.58 |
| PFOA | 1.34 | 0.79 | 2.29 | 0.56 |
| PFHpS | 1.01 | 0.60 | 1.69 | 0.97 |
| PFHpA | 1.80 | 1.30 | 2.50 | 0.003 |
| PFHxS | 0.92 | 0.65 | 1.31 | 0.74 |
| Logistic regression controlling for race, age, sex, parent's income, clinical site | | | | |

**Figure S1.** Association between plasma-PFAS and MASLD in Teen-LABS controlling

for race, sex, parent’s income, clinical site


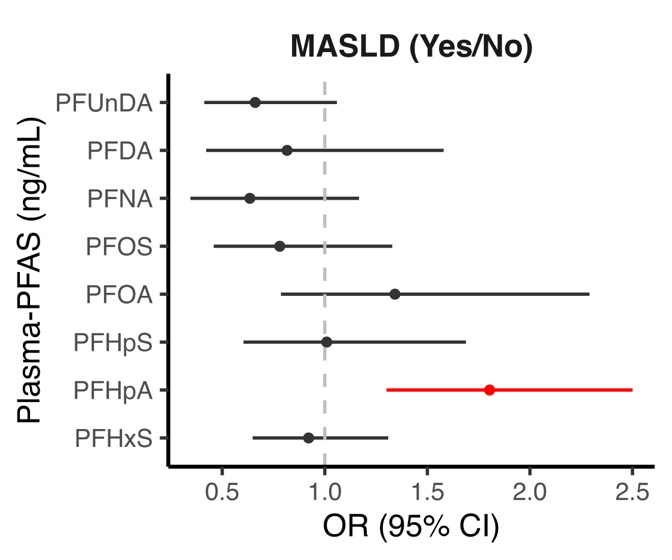


**Table S2.** PFHpA exposure, histopathological determined outcomes of MASLD in the Teen-LABS study

|  | OR | 95% CI | | P value | P trend |
| --- | --- | --- | --- | --- | --- |
| MASLD |  |  |  |  |  |
| No MASLD/MASH | ref | ref | ref | ref |  |
| MASLD not MASH | 1.68 | 1.19 | 2.37 | 0.003 |  |
| MASH | 2.10 | 1.37 | 3.23 | 0.001 |  |
| Steatosis |  |  |  |  |  |
| No steatosis | ref | ref | ref | ref |  |
| Possible | 1.52 | 1.01 | 2.26 | 0.04 |  |
| Definite | 1.61 | 0.84 | 3.05 | 0.15 |  |
| Steatosis grade |  |  |  |  |  |
| 0-5% | ref | ref | ref | ref |  |
| 5-33% | 1.61 | 1.16 | 2.24 | 0.004 |  |
| 33-67% and >67% | 1.88 | 1.22 | 2.89 | 0.004 |  |
| Hepatocellular Ballooning |  |  |  |  |  |
| None | ref | ref | ref | ref |  |
| Few | 1.56 | 0.98 | 2.50 | 0.06 |  |
| Many | 2.45 | 0.99 | 6.05 | 0.05 |  |
| MASH stage |  |  |  |  |  |
| 0 | ref | ref | ref | ref |  |
| 1 | 2.28 | 1.40 | 3.73 | 0.001 |  |
| 2 | 2.38 | 1.44 | 3.91 | 0.001 |  |
| >=3 | 3.04 | 1.78 | 5.21 | 0.000 |  |
| Fibrosis |  |  |  |  |  |
| No | ref | ref | ref | ref |  |
| Yes | 1.49 | 1.04 | 2.14 | 0.03 |  |
| PFHpA Quantiles & MASLD (n/y) |  |  |  |  |  |
| (0.015,0.049] | ref | ref | ref | ref | < 0.0001 |
| (0.049,0.0865] | 1.63 | 0.47 | 5.86 | 0.44 |
| (0.0865,0.176] | 2.29 | 0.67 | 8.31 | 0.19 |
| (0.176,2.81] | 6.88 | 1.88 | 28.00 | 0.005 |
| Models control for race, study site, age, sex, parental income | | | | | |

| **Table S3.** Metabolome-Wide Association Study (MWAS) between plasma-PFHpA and metabolites in Teen-LABS | | | | | | | |
| --- | --- | --- | --- | --- | --- | --- | --- |
| **Metabolite** | **estimate** | **se** | **test statistic** | **p value** | **mz** | **retention time** | **mode** |
| Isobutyryl-L-carnitine | 0.24 | 0.06 | 4.03 | 0.00 | 232.15 | 26.40 | c18pos |
| Cholate | 0.28 | 0.08 | 3.60 | 0.00 | 407.28 | 220.30 | c18neg |
| Trans-4-Hydroxy-L-Proline | 0.18 | 0.05 | 3.56 | 0.00 | 132.07 | 265.60 | hilicpos |
| Glycine | 0.20 | 0.06 | 3.50 | 0.00 | 464.30 | 257.80 | hilicneg |
| Glycocholic acid | 0.18 | 0.05 | 3.46 | 0.00 | 464.30 | 210.30 | c18neg |
| Aminolevulinic acid | 0.17 | 0.05 | 3.14 | 0.00 | 130.05 | 336.40 | hilicneg |
| Murideoxycholic acid | 0.20 | 0.07 | 3.10 | 0.00 | 451.31 | 233.40 | c18neg |
| Indole-3-Acetate | 0.17 | 0.06 | 3.04 | 0.00 | 174.06 | 32.00 | c18neg |
| Glycoursodeoxycholic acid | 0.16 | 0.05 | 3.04 | 0.00 | 448.31 | 222.10 | c18neg |
| Deoxycarnitine | 0.17 | 0.06 | 2.99 | 0.00 | 146.12 | 22.10 | c18pos |
| Glucuronate | 0.23 | 0.08 | 2.98 | 0.00 | 193.04 | 334.90 | hilicneg |
| Beta-Alanine | 0.16 | 0.06 | 2.93 | 0.00 | 88.04 | 336.10 | hilicneg |
| Tryptophan | 0.16 | 0.06 | 2.76 | 0.01 | 203.08 | 282.70 | hilicneg |
| Indolelactic acid | 0.16 | 0.06 | 2.75 | 0.01 | 204.07 | 34.00 | c18neg |
| Chenodeoxycholate | 0.15 | 0.06 | 2.73 | 0.01 | 391.29 | 241.50 | c18neg |
| Phenylpyruvic acid | 0.13 | 0.05 | 2.72 | 0.01 | 163.04 | 41.30 | c18neg |
| 5-Aminovaleric acid | 0.13 | 0.05 | 2.72 | 0.01 | 116.07 | 22.20 | c18neg |
| Tauroursodeoxycholic acid | 0.14 | 0.05 | 2.68 | 0.01 | 498.29 | 224.50 | c18neg |
| Uric Acid | 0.14 | 0.05 | 2.65 | 0.01 | 167.02 | 19.70 | c18neg |
| 3-Methylglutaric acid | 0.19 | 0.07 | 2.64 | 0.01 | 147.06 | 35.40 | c18pos |
| Proline | 0.15 | 0.06 | 2.56 | 0.01 | 114.06 | 315.30 | hilicneg |
| Indoxyl Sulfate | 0.16 | 0.06 | 2.55 | 0.01 | 212.00 | 41.00 | hilicneg |
| Homocysteine | 0.17 | 0.07 | 2.55 | 0.01 | 134.03 | 305.00 | hilicneg |
| Adipic acid | -0.14 | 0.06 | -2.50 | 0.01 | 145.05 | 18.50 | c18neg |
| Hypoxanthine | 0.16 | 0.06 | 2.47 | 0.01 | 135.03 | 213.80 | hilicneg |
| 2-Ethyl2-OH-40-2-Ethyl-2-hydroxybutyric acid | -0.15 | 0.06 | -2.44 | 0.02 | 131.07 | 71.70 | hilicneg |
| C111-Undecylenic acid | 0.18 | 0.08 | 2.40 | 0.02 | 183.14 | 54.60 | c18neg |
| 12-Ketochenodeoxycholic acid | 0.15 | 0.06 | 2.39 | 0.02 | 465.29 | 178.80 | hilicneg |
| 2-Methylbutyroylcarnitine | 0.13 | 0.05 | 2.36 | 0.02 | 246.17 | 42.50 | c18pos |
| Hippuric acid | -0.16 | 0.07 | -2.36 | 0.02 | 178.05 | 26.90 | c18neg |
| 2-Aminoisobutyrate | -0.13 | 0.05 | -2.35 | 0.02 | 102.06 | 326.50 | hilicneg |
| Erucate | 0.15 | 0.07 | 2.33 | 0.02 | 337.31 | 55.60 | hilicneg |
| Phenylalanine | 0.09 | 0.04 | 2.32 | 0.02 | 166.09 | 221.90 | hilicpos |
| Eicosapentaenoate | -0.14 | 0.06 | -2.32 | 0.02 | 301.22 | 58.30 | hilicneg |
| Ursocholic acid | 0.21 | 0.09 | 2.31 | 0.02 | 407.28 | 222.10 | hilicneg |
| N-Formyl-L-Methionine | 0.16 | 0.07 | 2.31 | 0.02 | 176.04 | 211.60 | hilicneg |
| Hexanoylcarnitine | 0.10 | 0.05 | 2.27 | 0.03 | 260.19 | 107.20 | c18pos |
| Theophylline | 0.15 | 0.07 | 2.25 | 0.03 | 181.07 | 80.70 | hilicpos |
| 3,4-Dihydroxymandelic acid | 0.12 | 0.06 | 2.13 | 0.03 | 183.03 | 272.50 | hilicneg |
| L-Carnitine | 0.12 | 0.06 | 2.12 | 0.04 | 162.11 | 21.20 | c18pos |
| Norvaline | 0.10 | 0.05 | 2.11 | 0.04 | 116.07 | 307.20 | hilicneg |
| Normetanephrine | 0.13 | 0.06 | 2.09 | 0.04 | 184.10 | 20.40 | c18pos |
| Glycochenodeoxycholic acid | 0.13 | 0.06 | 2.09 | 0.04 | 450.32 | 254.20 | c18pos |
| Cinnamoylglycine-trans | 0.12 | 0.06 | 2.08 | 0.04 | 204.07 | 176.30 | hilicneg |
| Sarcosine | 0.12 | 0.06 | 2.05 | 0.04 | 131.08 | 273.60 | hilicpos |
| Oxoglutarate | 0.12 | 0.06 | 2.04 | 0.04 | 145.01 | 320.10 | hilicneg |
| Adenine | 0.09 | 0.04 | 2.01 | 0.05 | 177.09 | 278.80 | hilicpos |
| Phytanic acid | -0.11 | 0.06 | -1.99 | 0.05 | 376.32 | 270.90 | c18pos |
| MWAS between plasma-PFHpA and metabolites measured in Teen-LABS participants controlling for race, age, sex, parent's income, clinical site. | | | | | | | |

| **Table S4.** Proteome-Wide Association Study (PWAS) between plasma-PFHpA and metabolites in Teen-LABS | | | | |
| --- | --- | --- | --- | --- |
| **Protein** | **estimate** | **se** | **test statistic** | **p value** |
| ccl25 | 0.14 | 0.05 | 3.09 | 0.00 |
| adamts16 | 0.09 | 0.03 | 3.07 | 0.00 |
| vcam1 | 0.05 | 0.02 | 2.80 | 0.01 |
| ikbkg | -0.20 | 0.07 | -2.71 | 0.01 |
| smpdl3a | 0.12 | 0.04 | 2.70 | 0.01 |
| ctsz | 0.06 | 0.03 | 2.58 | 0.01 |
| scgb3a2 | -0.15 | 0.06 | -2.56 | 0.01 |
| ccl20 | 0.17 | 0.07 | 2.54 | 0.01 |
| prss2 | 0.09 | 0.03 | 2.51 | 0.01 |
| prok1 | -0.12 | 0.05 | -2.47 | 0.02 |
| n tpro bnp | -0.20 | 0.08 | -2.43 | 0.02 |
| bank1 | -0.22 | 0.09 | -2.40 | 0.02 |
| igfbpl1 | 0.10 | 0.04 | 2.39 | 0.02 |
| gdf2 | 0.10 | 0.04 | 2.39 | 0.02 |
| adamts13 | 0.06 | 0.03 | 2.39 | 0.02 |
| hyal1 | 0.05 | 0.02 | 2.38 | 0.02 |
| sh2d1a | -0.12 | 0.05 | -2.36 | 0.02 |
| irak1 | -0.15 | 0.06 | -2.35 | 0.02 |
| map2k6 | -0.21 | 0.09 | -2.34 | 0.02 |
| ca5a | 0.19 | 0.08 | 2.31 | 0.02 |
| slamf7 | -0.08 | 0.04 | -2.30 | 0.02 |
| il18r1 | 0.06 | 0.03 | 2.29 | 0.02 |
| nub1 | -0.18 | 0.08 | -2.24 | 0.03 |
| adh4 | 0.15 | 0.07 | 2.23 | 0.03 |
| axl | 0.04 | 0.02 | 2.22 | 0.03 |
| hexim1 | -0.17 | 0.08 | -2.19 | 0.03 |
| ccl24 | 0.14 | 0.06 | 2.19 | 0.03 |
| ace2 | 0.10 | 0.04 | 2.18 | 0.03 |
| c2 | 0.04 | 0.02 | 2.18 | 0.03 |
| plxna4 | -0.14 | 0.07 | -2.17 | 0.03 |
| arhgef12 | -0.18 | 0.09 | -2.14 | 0.03 |
| tbc1d5 | -0.16 | 0.07 | -2.14 | 0.03 |
| stx8 | -0.13 | 0.06 | -2.14 | 0.03 |
| bcl2l11 | -0.12 | 0.06 | -2.12 | 0.04 |
| il6st | 0.03 | 0.01 | 2.12 | 0.04 |
| il1rn | 0.14 | 0.07 | 2.11 | 0.04 |
| robo1 | 0.06 | 0.03 | 2.10 | 0.04 |
| hpcal1 | -0.13 | 0.06 | -2.10 | 0.04 |
| hla_e | 0.06 | 0.03 | 2.10 | 0.04 |
| fxyd5 | -0.15 | 0.07 | -2.10 | 0.04 |
| trem2 | 0.12 | 0.06 | 2.10 | 0.04 |
| f7 | 0.05 | 0.02 | 2.10 | 0.04 |
| osmr | 0.04 | 0.02 | 2.08 | 0.04 |
| pm20d1 | -0.33 | 0.16 | -2.06 | 0.04 |
| snx9 | -0.11 | 0.05 | -2.05 | 0.04 |
| milr1 | -0.09 | 0.04 | -2.04 | 0.04 |
| col1a1 | 0.06 | 0.03 | 2.04 | 0.04 |
| ccl27 | 0.09 | 0.04 | 2.03 | 0.04 |
| vsir | -0.11 | 0.05 | -2.03 | 0.04 |
| susd1 | -0.12 | 0.06 | -2.02 | 0.05 |
| ghrl | -0.11 | 0.06 | -2.01 | 0.05 |
| trim21 | -0.18 | 0.09 | -2.01 | 0.05 |
| acy1 | 0.10 | 0.05 | 1.99 | 0.05 |
| bach1 | -0.10 | 0.05 | -1.99 | 0.05 |
| ppp1r9b | -0.17 | 0.09 | -1.98 | 0.05 |
| PWAS between plasma-PFHpA and proteins measured in Teen-LABS participants controlling for race, age, sex, parent's income, clinical site. | | | | |


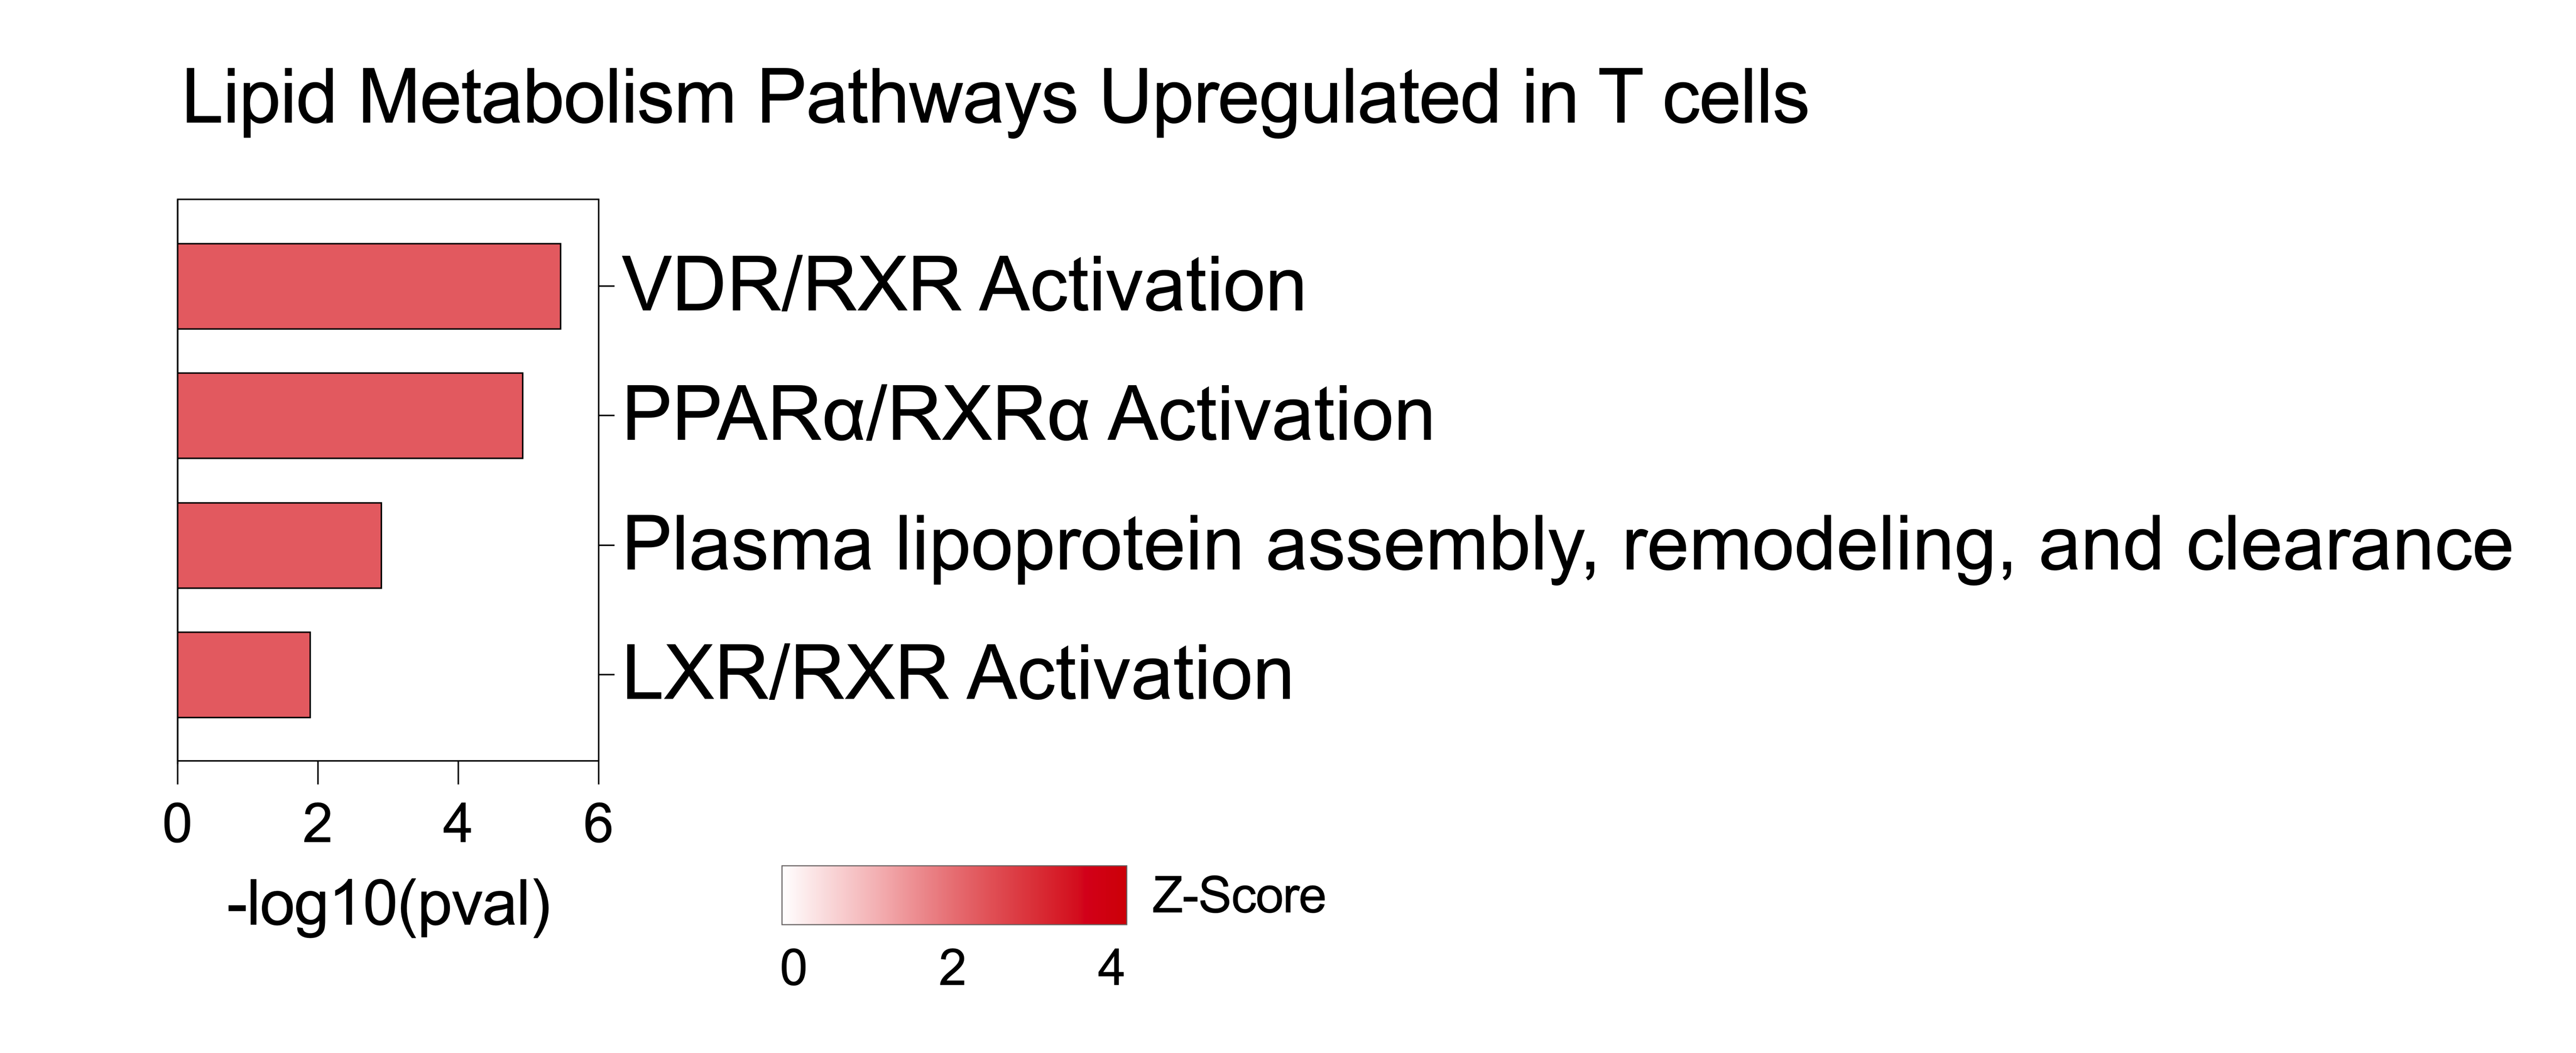


**Figure S2.** Lipid metabolism pathways upregulated in T cells from 3D liver spheroids exposed to PFHpA for 7 days.
